# Supplementary material for: Smoke-charged vortices in the stratosphere generated by wildfires and their behaviour in both hemispheres: comparing Australia 2020 to Canada 2017
Source: Copernicus journal article supplement (doi:10.5194/acp-21-7113-2021), 2021-05-10
Supplement: Supplementary file 2 [file acp-21-7113-2021-supplement.zip]

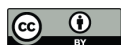

*Supplement of*

**Smoke-charged vortices in the stratosphere generated by wildfires and their behaviour in both hemispheres: comparing Australia 2020 to Canada 2017**

**Hugo Lestrelin et al.**

*Correspondence to:* Bernard Legras ([legras@lmd.ens.fr](mailto:legras@lmd.ens.fr))

- [acp-21-7113-2021-supplement-title-page.pdf](#)
- [media](#)
  - [movieMax\\_VortexO.mp4](#)
  - [movie\\_VortexA.mp4](#)
  - [movie\\_VortexB1.mp4](#)
  - [movie\\_VortexB2.mp4](#)
  - [tracking.mov](#)
- [supplement.pdf](#)

The copyright of individual parts of the supplement might differ from the article licence.
